# Supplementary material for: Hsp70 Oligomerization Is Mediated by an Interaction between the Interdomain Linker and the Substrate-Binding Domain
Source: PubMed Central journal article supplement (PMC3696110; doi:10.1371/journal.pone.0067961), 2013-06-28
Supplement: pone.0067961.s001.pdf [file pone.0067961.s001.pdf]

**Hsp70 Oligomerization is Mediated by an Interaction  
between the Interdomain Linker and  
the Substrate-Binding Domain**

Francesco A. Aprile, Anne Dhulesia, Florian Stengel, Cintia Roodveldt, Justin L Benesch,  
Paolo Tortora, Carol V. Robinson, Xavier Salvatella, Christopher M. Dobson and Nunilo  
Cremades

Correspondence should be addressed to N.C. (nc347@cam.ac.uk).

## **Supporting Information**

### **Supplementary Materials and Methods**

*Dynamic light scattering.* Representative size distributions of SBD641 at different protein concentrations in Tris 50 mM, pH 7.4, 150 mM KCl, 5 mM MgCl<sub>2</sub> were recorded at 25 °C on the Zetasizer Nano ZS instrument (Malvern Instruments Ltd.) at 633 nm after 1 h of incubation at room temperature. Alterations on the size distribution by substrate binding were also tested at exactly the same conditions, incubating 16 μM of SBD641 in the presence of different concentrations of the NR peptide (ratio 1:1, 1:5 and 1:15). Some samples were analyzed after 1 h and 4 h incubation at room temperature and the same intensity size distributions were obtained. The samples were centrifuged for 15 min at 13200 rpm to remove dust particles and the scattered light was detected at an angle of 173°. The acquired data were analyzed by Zetasizer Nano software (Malvern Instruments Ltd.).

*Fluorescence competition assay.* Samples containing 50  $\mu\text{M}$   $\Delta\text{LSBD641}$  and 2  $\mu\text{M}$  dansylated-NR peptide (D-NR) in Tris 50 mM, pH 7.4, 150 mM KCl, 5 mM  $\text{MgCl}_2$  were incubated in the presence of different concentrations of non-dansylated NR peptide (ND-NR; 0, 50 and 200  $\mu\text{M}$ ) for 1h at room temperature and the dansyl fluorescence emission spectrum of each sample was recorded from 400 to 630 nm after excitation at 330 nm. The intensity at the maximum emission wavelength of three different samples for which ten spectra were recorded was averaged, and the fraction of bound D-NR peptide was then determined experimentally from the reduction in the fluorescence signal in relation to the reference sample without ND-NR peptide for which the fraction of bound D-NR peptide is known (83% of the D-NR peptide is bound in this conditions according to the affinity measured by fluorescence titration; see Figure 5a in main text).

The fraction of bound D-NR peptide was theoretically calculated for each sample according to a competitive model where the two ligands bind to the same substrate-binding pocket in the chaperone and assuming different values for the affinity of the ND-NR peptide for  $\Delta\text{LSBD641}$  ( $K_d = 4, 8, 12, 16, 24 \mu\text{M}$ ; the  $K_d$  for D-NR peptide obtained experimentally by direct fluorescence titration was  $8 \pm 2 \mu\text{M}$ ).

From the mass balance of the total protein concentration ( $P_T$ ) in a two-ligands competitive model and substituting the concentration of each complex ( $PL_1$  and  $PL_2$ , corresponding to the complex with D-NR and ND-NR peptide, respectively) by the expression obtained from the definition of the different dissociation constants, a third-order polynomial expression ( $A \cdot P^3 + B \cdot P^2 + C \cdot P + D = 0$ ) of the free concentration of protein ( $P$ ) is obtained, where the coefficients of the different terms are:

$$A = 1; B = K_{d1} + K_{d2} + L_{1T} + L_{2T} - P_T; C = K_{d1}K_{d2} + L_{1T}K_{d2} + L_{2T}K_{d1} - k_{d1}P_T - K_{d2}P_T; \\ D = -K_{d1}K_{d2}P_T$$

where  $K_{d1} = 8 \mu\text{M}$ , the dissociation constant of the D-NR peptide: $\Delta\text{LSBD641}$  complex,  $K_{d2}$  is the dissociation constant of the ND-NR peptide: $\Delta\text{LSBD641}$  complex,  $P_T = 50 \mu\text{M}$ , the total concentration of  $\Delta\text{LSBD641}$ ,  $L_{1T} = 2 \mu\text{M}$ , the total concentration of D-NR peptide, and  $L_{2T}$  is the total concentration of ND-NR peptide.

## Supplementary Tables

**Table S1. Comparison of the secondary structure content of the different human Hsp70 variants used in this study derived from far-UV CD spectrum with that expected according to the crystal structure of homologues proteins.**

|                                   | Predicted from crystal structure <sup>a</sup> (%) |                |             | Estimated from far-UV CD <sup>b</sup> (%) |                |             |
|-----------------------------------|---------------------------------------------------|----------------|-------------|-------------------------------------------|----------------|-------------|
|                                   | $\alpha$ -helix                                   | $\beta$ -sheet | Random-coil | $\alpha$ -helix                           | $\beta$ -sheet | Random-coil |
| <b>SBD556</b>                     | 22.6                                              | 26.9           | 50.5        | 21                                        | 25             | 54          |
| <b>SBD641</b>                     | 37.4                                              | 21.8           | 40.8        | 33                                        | 18             | 49          |
| <b><math>\Delta</math>LSBD641</b> | 37.4                                              | 22.5           | 40.1        | 35                                        | 18             | 47          |
| <b>C-term</b>                     | 64                                                | 0              | 36          | 60                                        | 7              | 33          |
| <b>FL-Hsp70</b>                   | 39.8                                              | 22.1           | 38.1        | 45                                        | 23             | 32          |

<sup>a</sup> NBD (PDB ID: [1HJO](#) [S1]) and SBD (PDB ID: [1DKX](#) [8])

<sup>b</sup> K2D software was used for spectra deconvolution [35,S2].

**Table S2. Assignment of charge state series for nESI MS measurements of protein constructs<sup>a</sup>.**

|                      |                  |                |              |             |            |                   |              |              |
|----------------------|------------------|----------------|--------------|-------------|------------|-------------------|--------------|--------------|
| <b>FL Hsp 70</b>     | <b>Monomeric</b> | <b>Dimeric</b> | <b>3 mer</b> | <b>4mer</b> | <b>Sum</b> | <b>Percentage</b> | <b>3 mer</b> | <b>4 mer</b> |
| <b>Fig. 2C</b>       | m/z              | m/z            | m/z          | m/z         | m/z        | Momomer           | Dimer        | 4 mer        |
| <b>Peak</b>          | 3937             | 4169           | 4433         | 5456        | 5675       | 5912              |              |              |
| <b>Charge State</b>  | 18+              | 17+            | 16+          | 23+         | 22+        | 21+               |              |              |
| <b>Rel Intensity</b> | 325              | 280            | 55           | 5           | 6          | 3                 | 674          | 98           |
|                      |                  |                |              |             |            |                   | 2            | 0            |
| <b>SBD 641</b>       | <b>Monomeric</b> | <b>Dimeric</b> | <b>3 mer</b> | <b>4mer</b> | <b>Sum</b> | <b>Percentage</b> | <b>3 mer</b> | <b>4 mer</b> |
| <b>Fig. 2D</b>       | m/z              | m/z            | m/z          | m/z         | m/z        | Momomer           | Dimer        | 4 mer        |
| <b>Peak</b>          | 2596             | 2851           | 3151         | 3550        | 3787       | 4058              | 4253         | 4485         |
| <b>Charge State</b>  | 11+              | 10+            | 09+          | 16+         | 15+        | 14+               | 19+          | 18+          |
| <b>Rel Intensity</b> | 32               | 52             | 12           | 33          | 36         | 13                | 6            | 12           |
|                      |                  |                |              |             |            |                   | 7            | 2            |
|                      |                  |                |              |             |            |                   | 207          | 46           |
|                      |                  |                |              |             |            |                   | 40           | 12           |
|                      |                  |                |              |             |            |                   | 2            | 2            |
| <b>ΔLSBD641</b>      | <b>Monomeric</b> | <b>Dimeric</b> | <b>3 mer</b> | <b>4mer</b> | <b>Sum</b> | <b>Percentage</b> | <b>3 mer</b> | <b>4 mer</b> |
| <b>Fig. 3C</b>       | m/z              | m/z            | m/z          | m/z         | m/z        | Momomer           | Dimer        | 4 mer        |
| <b>Peak</b>          | 2476             | 2724           | 3638         | 3903        |            |                   |              |              |
| <b>Charge State</b>  | 11+              | 10+            | 15+          | 14+         |            |                   |              |              |
| <b>Rel Intensity</b> | 216              | 243            | 22           | 16          |            |                   |              |              |
|                      |                  |                |              |             |            |                   |              |              |
|                      |                  |                |              |             |            |                   | 497          | 92           |
|                      |                  |                |              |             |            |                   | 8            | 8            |
| <b>SBD556</b>        | <b>Monomeric</b> | <b>Dimeric</b> | <b>3 mer</b> | <b>4mer</b> | <b>Sum</b> | <b>Percentage</b> | <b>3 mer</b> | <b>4 mer</b> |
| <b>Fig. 2G</b>       | m/z              | m/z            | m/z          | m/z         | m/z        | Momomer           | Dimer        | 4 mer        |
| <b>Peak</b>          | 2174             | 2446           | 2794         | 3002        | 3251       | 3547              | 3904         | 4181         |
| <b>Charge State</b>  | 9+               | 8+             | 7+           | 13+         | 12+        | 11+               |              |              |
| <b>Rel Intensity</b> | 114              | 240            | 17           | 9           | 41         | 21                | 7            | 5            |
|                      |                  |                |              |             |            |                   |              |              |
|                      |                  |                |              |             |            |                   | 454          | 82           |
|                      |                  |                |              |             |            |                   | 16           | 3            |
|                      |                  |                |              |             |            |                   | 3            | 0            |
| <b>C-term</b>        | <b>Monomeric</b> | <b>Dimeric</b> | <b>3 mer</b> | <b>4mer</b> | <b>Sum</b> | <b>Percentage</b> | <b>3 mer</b> | <b>4 mer</b> |
| <b>Fig. 2H</b>       | m/z              | m/z            | m/z          | m/z         | m/z        | Momomer           | Dimer        | 4 mer        |
| <b>Peak</b>          | 1396             | 1595           | 2526         |             |            |                   |              |              |
| <b>Charge State</b>  | 7+               | 6+             | 9+           |             |            |                   |              |              |
| <b>Rel Intensity</b> | 28               | 43             |              |             |            |                   |              |              |
|                      |                  |                |              |             |            |                   |              |              |
|                      |                  |                |              |             |            |                   | 71           | 100          |

<sup>a</sup> Nanoflow electrospray mass spectra of the different protein constructs: FL-Hsp70, SBD641, ΔLSBD641, SBD556 and C-term used in this study. Shown are the charge states used for unambiguous assignment and quantification. Color coding as in the main text is used: charge state series assigned to the monomers are shown in green. Dimers, 3mers and 4mers are shown in red, blue and yellow, respectively

**Table S3. Thermodynamic parameters<sup>a</sup> of protein thermal denaturation obtained for the different Hsp70 truncated variants.**

|                                   | <b>1<sup>st</sup> transition</b> |            | <b>2<sup>nd</sup> transition</b> |            |
|-----------------------------------|----------------------------------|------------|----------------------------------|------------|
|                                   | $\Delta H_m$                     | $T_m$      | $\Delta H_m$                     | $T_m$      |
| <b>SBD556</b>                     | 63.9 ± 1.9                       | 46.8 ± 0.1 | 85.4 ± 2.6                       | 64.5 ± 0.1 |
| <b>SBD641</b>                     | 49.4 ± 3.3                       | 45.6 ± 0.4 | 53.3 ± 1.2                       | 73.1 ± 0.1 |
| <b><math>\Delta</math>LSBD641</b> | 45.6 ± 2.4                       | 44.9 ± 0.3 | 61.0 ± 1.1                       | 72.3 ± 0.1 |
| <b>C-term</b>                     | 51.5 ± 1.5                       | 49.9 ± 0.2 | -                                | -          |

<sup>a</sup>  $\Delta H_m$  is given in kcal.mol<sup>-1</sup> and  $T_m$  in °C.

The errors reported in the table represent the standard errors of the fits.

**Table S4. Determination of the influence of dansyl fluorophore in the affinity of the NR peptide for Hsp70 <sup>a</sup>.**

| Ratio<br>$\Delta$ LSBD641:ND-NR | Fraction of bound dansylated NR peptide |                                      |      |      |      |      |
|---------------------------------|-----------------------------------------|--------------------------------------|------|------|------|------|
|                                 | Experimentally determined <sup>b</sup>  | Theoretically estimated <sup>c</sup> |      |      |      |      |
|                                 |                                         | $K_{d\_ND-NR}$ ( $\mu$ M)            |      |      |      |      |
|                                 |                                         | 4                                    | 8    | 12   | 16   | 24   |
| 1:0                             | 0.83                                    | -                                    | -    | -    | -    | -    |
| 1:1                             | 0.62 $\pm$ 0.1                          | 0.59                                 | 0.66 | 0.7  | 0.72 | 0.75 |
| 1:4                             | 0.35 $\pm$ 0.1                          | 0.14                                 | 0.24 | 0.31 | 0.37 | 0.45 |

<sup>a</sup> The influence of the dansyl moiety on the affinity of the NR peptide was determined by a competitive assay between dansylated and non-dansylated NR peptide (D-NR, ND-NR, respectively).

<sup>b</sup> See Supp. Materials and Methods.

<sup>c</sup> The theoretical fraction of D-NR peptide bound in presence of ND-NR peptide was determined according to a competitive model where the two ligands bind to the same protein binding site and assuming different affinities for the binding of the ND-NR peptide for the chaperone. The good agreement between the experimental and the theoretical values assuming an affinity for the ND-NR peptide similar to the affinity found for the D-NR peptide ( $K_d$  ca. 8  $\mu$ M) demonstrates that dansylated and non-dansylated NR peptide have very similar (if not the same) affinities and further proves the use of dansyl fluorophore to assay the binding of substrates in Hsp70.

**Table S5. Assignment of charge state series for nESI MS measurements of SBD641 in the presence of NR peptide<sup>a</sup>.**

| SBD641+ NR peptide     |      |                          |      |      |                        |      |      |                       |      |                      |      |         |            |       |       |   |
|------------------------|------|--------------------------|------|------|------------------------|------|------|-----------------------|------|----------------------|------|---------|------------|-------|-------|---|
| SBD641                 |      | Monomeric                |      |      | Dimeric                |      |      | 3 mer                 |      | 4mer                 |      | Sum     | Percentage |       |       |   |
|                        | m/z  | m/z                      | m/z  | m/z  | m/z                    | m/z  | m/z  | m/z                   | m/z  | m/z                  | m/z  | Monomer | Dimer      | 3 mer | 4 mer |   |
| <b>Fig. 7</b>          |      |                          |      |      |                        |      |      |                       |      |                      |      |         |            |       |       |   |
| Peak                   | 2573 | 2830                     | 3144 | 3535 | 3770                   | 4039 | 4248 | 4472                  | 4350 | 4526                 | 4712 |         |            |       |       |   |
| Charge State           | 11+  | 10+                      | 9+   | 16+  | 15+                    | 14+  | 20+  | 19+                   | 26+  | 25+                  |      |         |            |       |       |   |
| Rel Intensity          | 92   | 179                      | 99   | 69   | 65                     | 34   | 12   | 15                    | 9    | 12                   |      | 586     | 63         | 29    | 5     | 4 |
| SBD 641 + NR Peptide   |      | Monomeric + NR peptide   |      |      | Dimeric + NR peptide   |      |      | 3 mer + NR peptide    |      | 4mer + NR peptide    |      | Sum     | Percentage |       |       |   |
|                        | m/z  | m/z                      | m/z  | m/z  | m/z                    | m/z  | m/z  | m/z                   | m/z  | m/z                  | m/z  | Monomer | Dimer      | 3 mer | 4 mer |   |
| <b>Fig. 7</b>          |      |                          |      |      |                        |      |      |                       |      |                      |      |         |            |       |       |   |
| Peak                   | 2665 | 2933                     | 3257 | 3598 | 3838                   | 4113 |      |                       |      |                      |      |         |            |       |       |   |
| Charge State           | 11+  | 10+                      | 9+   | 16+  | 15+                    | 14+  |      |                       |      |                      |      |         |            |       |       |   |
| Rel Intensity          | 29   | 16                       | 5    | 49   | 33                     | 9    |      |                       |      |                      |      | 141     | 35         | 65    | 0     | 0 |
| SBD 641 + 2 NR Peptide |      | Monomeric + 2 NR peptide |      |      | Dimeric + 2 NR peptide |      |      | 3 mer + 2 NR peptides |      | 4mer + 2 NR peptides |      | Sum     | Percentage |       |       |   |
|                        | m/z  | m/z                      | m/z  | m/z  | m/z                    | m/z  | m/z  | m/z                   | m/z  | m/z                  | m/z  | Monomer | Dimer      | 3 mer | 4 mer |   |
| <b>Fig. 7</b>          |      |                          |      |      |                        |      |      |                       |      |                      |      |         |            |       |       |   |
| Peak                   |      |                          |      | 3665 |                        |      |      |                       |      |                      |      |         |            |       |       |   |
| Charge State           |      |                          |      | 16+  |                        |      |      |                       |      |                      |      |         |            |       |       |   |
| Rel Intensity          |      |                          |      | 6    |                        |      |      |                       |      |                      |      | 9       | 0          | 100   | 0     | 0 |

<sup>a</sup> Nanoflow electrospray mass spectra of SBD641 in presence of NR peptide in a ratio 1:1. Shown are the charge states used for unambiguous assignment and quantification. Color coding as in the main text is used.



**Table S6. Comparison between the theoretical and experimental masses obtained by MS for SBD641 incubated with NR peptide.**

|                          | Mass (calc) in Da | Mass (measured) in Da      | Error (calc vs measured) in % |
|--------------------------|-------------------|----------------------------|-------------------------------|
| Monomeric                | 28209             | 28307                      | 0.346                         |
| Dimeric                  | 56418             | 56536                      | 0.209                         |
| 3 mer                    | 84627             | 84942                      | 0.371                         |
| 4mer                     | 112836            | 113091                     | 0.225                         |
| NR peptide               | 1020              |                            |                               |
| Monomeric + NR peptide   | 29229             | 29323                      | 0.321                         |
| Monomeric + 2 NR peptide | 30249             | not identified in spectrum |                               |
| Dimeric + NR peptide     | 57438             | 57552                      | 0.198                         |
| Dimeric + 2 NR peptide   | 58458             | 58548                      | 0.154                         |
| 3 mer + NR peptide       | 85647             | 85973                      | 0.379                         |
| 3 mer + 2 NR peptides    | 86667             | not identified in spectrum |                               |
| 4mer + NR peptide        | 113856            | not identified in spectrum |                               |
| 4mer + 2 NR peptides     | 114876            | not identified in spectrum |                               |

## Supplementary References

1. Osipiuk J, Walsh MA, Freeman BC, Morimoto RI, Joachimiak A (1999) Structure of a new crystal form of human Hsp70 ATPase domain. *Acta Crystallogr D Biol Crystallogr* 55: 1105-1107.
2. Merelo JJ, Andrade MA, Prieto A, Morán F (1994) Proteinotopic feature maps. *Neurocomputing* 6: 443-454.
3. Toyota H, Hosokawa M, Urabe I, Yomo T (2008) Emergence of polyproline II-like structure at early stages of experimental evolution from random polypeptides. *Mol Biol Evol* 25: 1113-1119.
